# Supplementary material
Source: publisher site journal article supplement (https://static.cambridge.org/content/id/urn:cambridge.org:id:article:S1368980020002013/resource/name/S1368980020002013supp001.docx)
Supplement: Supplementary file 1 [file S1368980020002013supp001.docx]

Additional file 1

Mean frequencies and percentages of sales and revenue per category per week per phase of canteen A

Category (number of products) Phase 0 (26 weeks) Baseline phase (3 weeks) Intervention phase (26 weeks)

Revenue: M (SD) (%) Sales: M (SD) (%) Sales: M (SD) (%) Revenue: M (SD) (%)

Nudged products (9) - 6.33 (5.13) (0.37%) 11.85 (10.51) (0.87%) 18.78 (16.14) (0.75%)

Hot drinks (10) 557.76 (252.91) (22.57%) 504.00 (71.08) (29.35%) 423.96 (212.14) (31.13%) 608.17 (304.10) (24.33%)

Alcoholic beverages (9) 699.61 (296.46) (28.31%) 354.67 (77.02) (20.65%) 237.58 (96.72) (17.44%) 586.59 (240.14) (23.46%)

Sugary drinks (18) 463.80 (214.49) (18.77%) 300.67 (63.32) (17.51%) 232.58 (120.46) (17.08%) 505.52 (258.67) (20.22%)

Deep fried foods/snacks from the grill (25) 304.72 (179.60) (12.33%) 143.33 (31.90) (8.35%) 113.88 (63.84) (8.36%) 275.92 (154.57) (11.04%)

Sandwiches/bread/wraps (14) 235.26 (136.46) (9.52%) 199.33 (29.37) (11.61%) 140.23 (70.06) (10.30%) 280.35 (143.14) (11.21%)

Candy (14) 79.96 (40.87) (3.24%) 110.77 (22.81) (6.44%) 91.38 (43.37) (6.71%) 73.10 (36.69) (2.92%)

Snacks savoury cold (5) 42.06 (25.84) (1.70%) 44.33 (15.37) (2.58%) 49.96 (36.26) (3.67%) 40.37 (23.24) (1.61%)

Drinks with zero added sugar (7) 39.54 (31.88) (1.60%) 32.00 (12.49) (1.86%) 31.23 (27.83) (2.29%) 62.46 (55.67) (2.50%)

Rest (10) 33.12 (21.57) (1.34%) 22.33 (8.33) (1.30%) 20.12 (13.69) (1.48%) 46.37 (25.72) (1.85%)

Ice cream (4) 15.34 (46.31) (0.62%) 2.33 (4.04) (0.14%) 17.08 (35.36) (1.25%) 19.11 (40.00) (0.76%)

Fruits (2) - 2.67 (4.62) (0.16%) 3.96 (6.42) (0.29%) 1.98 (3.21) (0.08%)

Dairy products (1) - 1.00 (1.00) (0.06%) 0.08 (0.39) (0.01%) 0.15 (0.78) (0.01%)

Total (119) 2470.85 (1038.47) (100%) 1717.33 (216.31) (100%) 1362.04 (584.76) (100%) 2500.10 (1102.94) (100%)

*Note:* The number of nudged products is set at 9 instead of eight, since the two different kinds of flavours of popcorn were registered separately in the cash register.
